# Supplementary material
Source: Springer Nature journal article supplement (https://www.springermedizin.de/resource/supplementary/12985_2010_904_MOESM4_ESM.pdf/9608706)

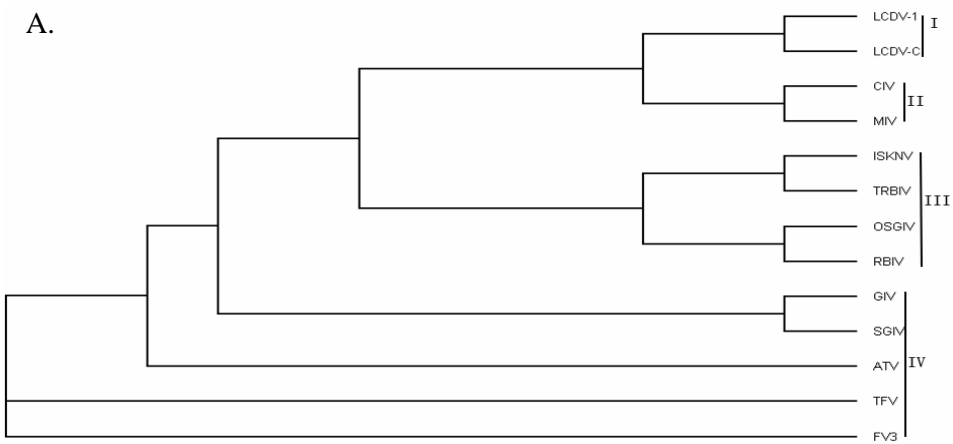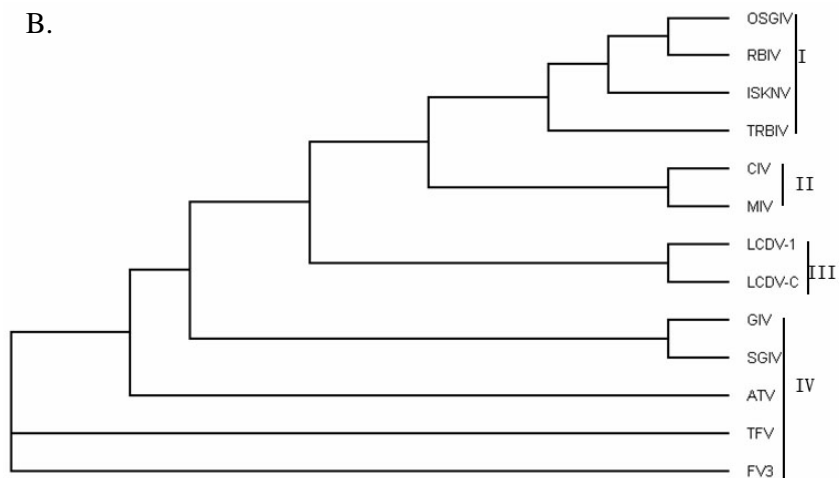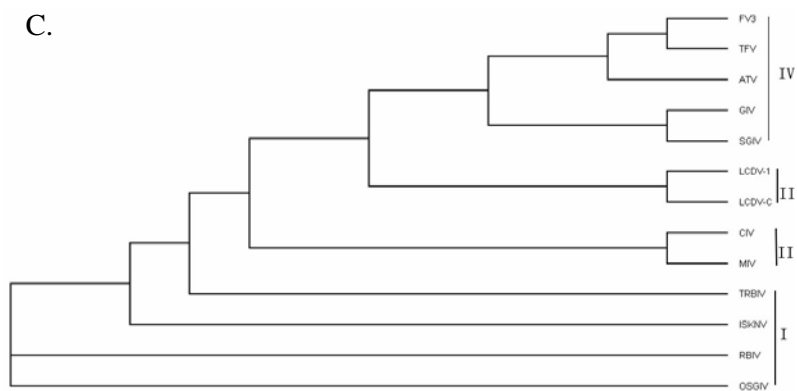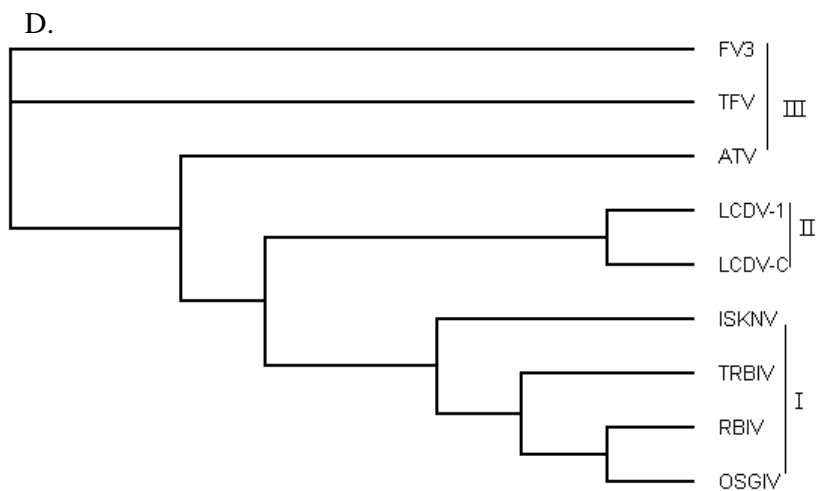

Supplement: MOESM4 [file 9608706]
